# Supplementary material
Source: PubMed Central journal article supplement (PMC8892844)
Supplement: ao1c07186_si_001.pdf [file ao1c07186_si_001.pdf]

Supporting Information for

## **Binding studies of the prodrug HAO472 to SARS-Cov-2 Nsp9 and variants**

Miaomiao Liu,<sup>†</sup> Dene R. Littler,<sup>‡</sup> Jamie Rossjohn,<sup>#‡</sup> Ronald J Quinn<sup>†\*</sup>

<sup>†</sup>Griffith Institute for Drug Discovery, Griffith University, Brisbane, Queensland, Australia

<sup>‡</sup>Infection and Immunity Program & Department of Biochemistry and Molecular Biology, Biomedicine Discovery Institute, Monash University, Clayton, Victoria, Australia

<sup>#</sup>Institute of Infection and Immunity, Cardiff University School of Medicine, Heath Park, Cardiff, United Kingdom

\* [r.quinn@griffith.edu.au](mailto:r.quinn@griffith.edu.au)

Table of Contents

Figure S1: Comparison of native MS spectra of oridonin (**1**) binding to three Nsp9 homologues at 10  $\mu$ M and 30  $\mu$ M.

Figure S2: Comparison of native MS spectra of HAO472 (**2**) binding to three Nsp9 homologues at 1  $\mu$ M and 10  $\mu$ M.

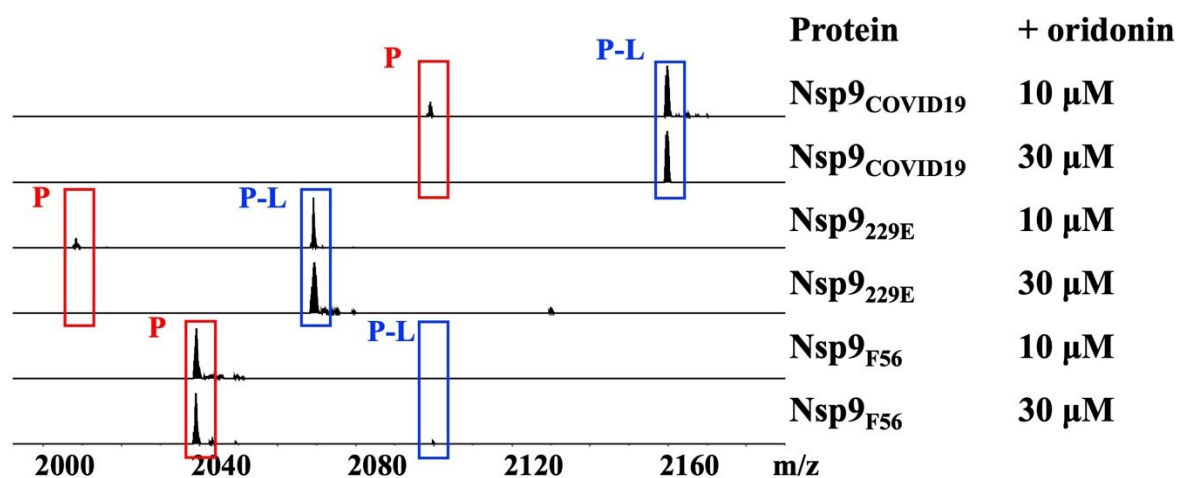

Figure S1. Comparison of native MS spectra of oridonin (1) binding to three Nsp9 homologues at 10 μM and 30 μM. Only charge state 6+ was shown in the spectra.

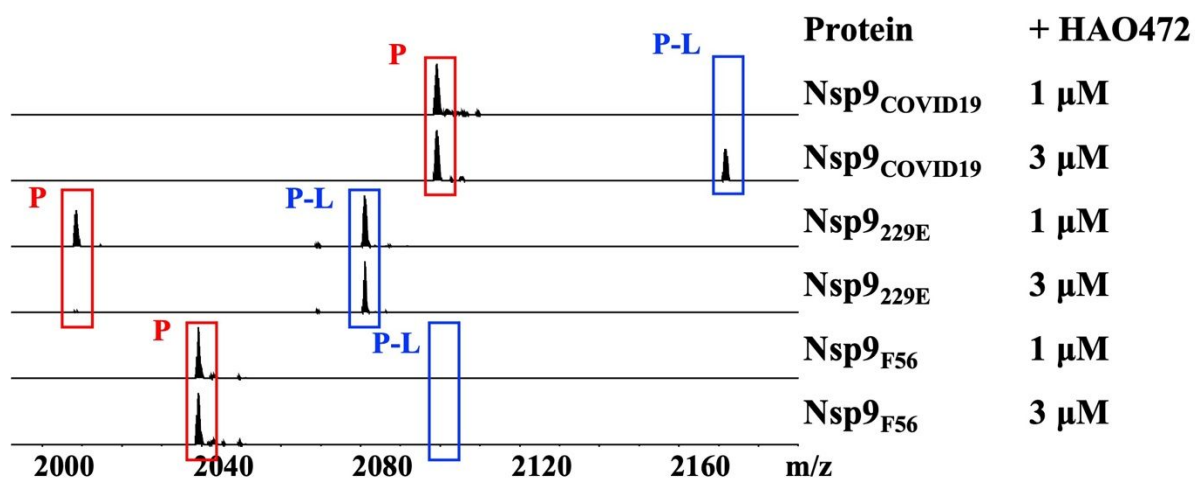

Figure S2. Comparison of native MS spectra of HAO472 (2) binding to three Nsp9 homologues at 1 μM and 10 μM. Only charge state 6+ was shown in the spectra.
